# Supplementary material
Source: PubMed Central journal article supplement (PMC8581441)
Supplement: mmc1.pdf [file mmc1.pdf]

# Appendix

## Figures

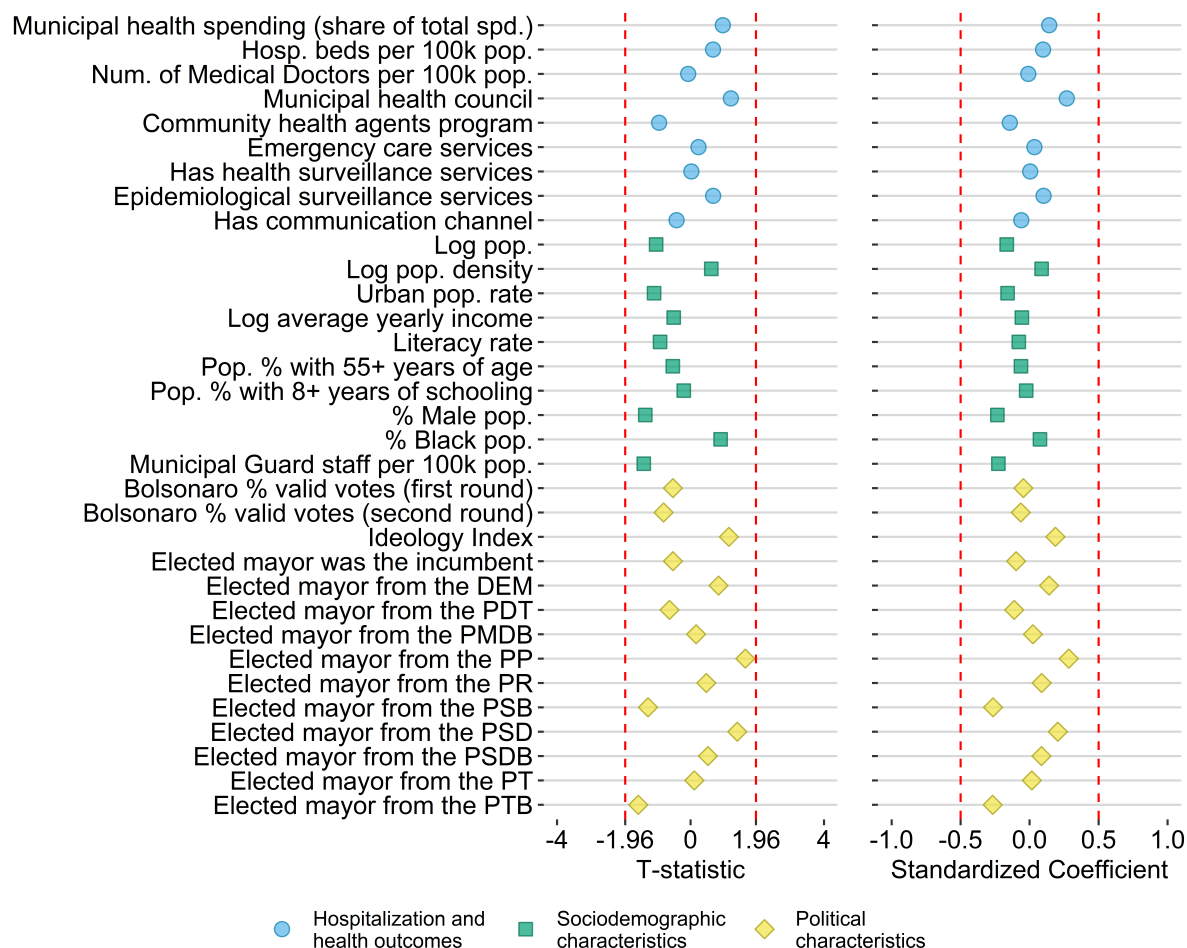

**Figure A1:** Baseline covariate balance around the threshold

*Notes:* This figure displays the robust-bias corrected t-statistics and standardized coefficients from our baseline covariates' balance RD estimates. For each indicated variable we run a RD with linear polynomial and uniform kernel specification. Optimal bandwidths following [Calonico et al. \(2014\)](#) were chosen to minimize the mean squared error of the local polynomial RD point estimator. All estimates account for state fixed-effects following Equation 1. In the t-statistics graph we indicate the 5% significance level thresholds in red. For more details on these estimations see [Tables A5 and A7](#). For variables' description see [Table A2](#).

Figure A2: McCrary Test

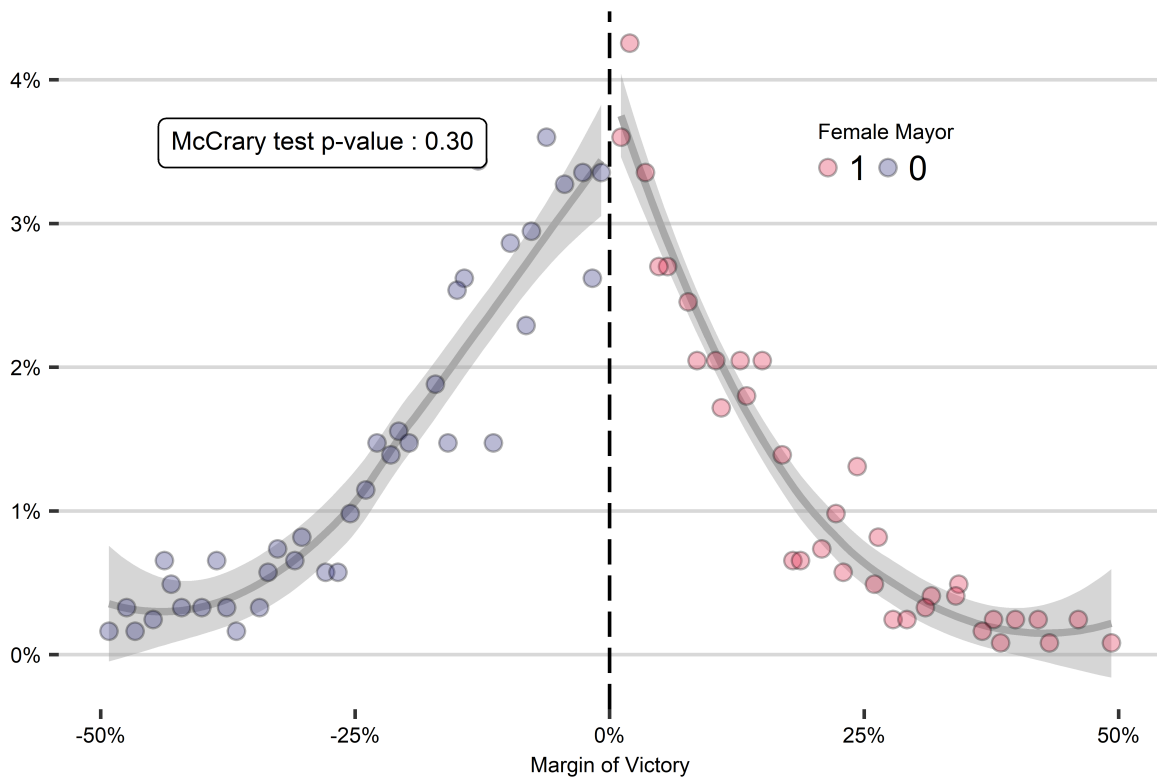

Notes: This figures displays the McCrary density test for the running variable around the cutoff (McCrary, 2008).

**Figure A3: Bandwidth robustness test**

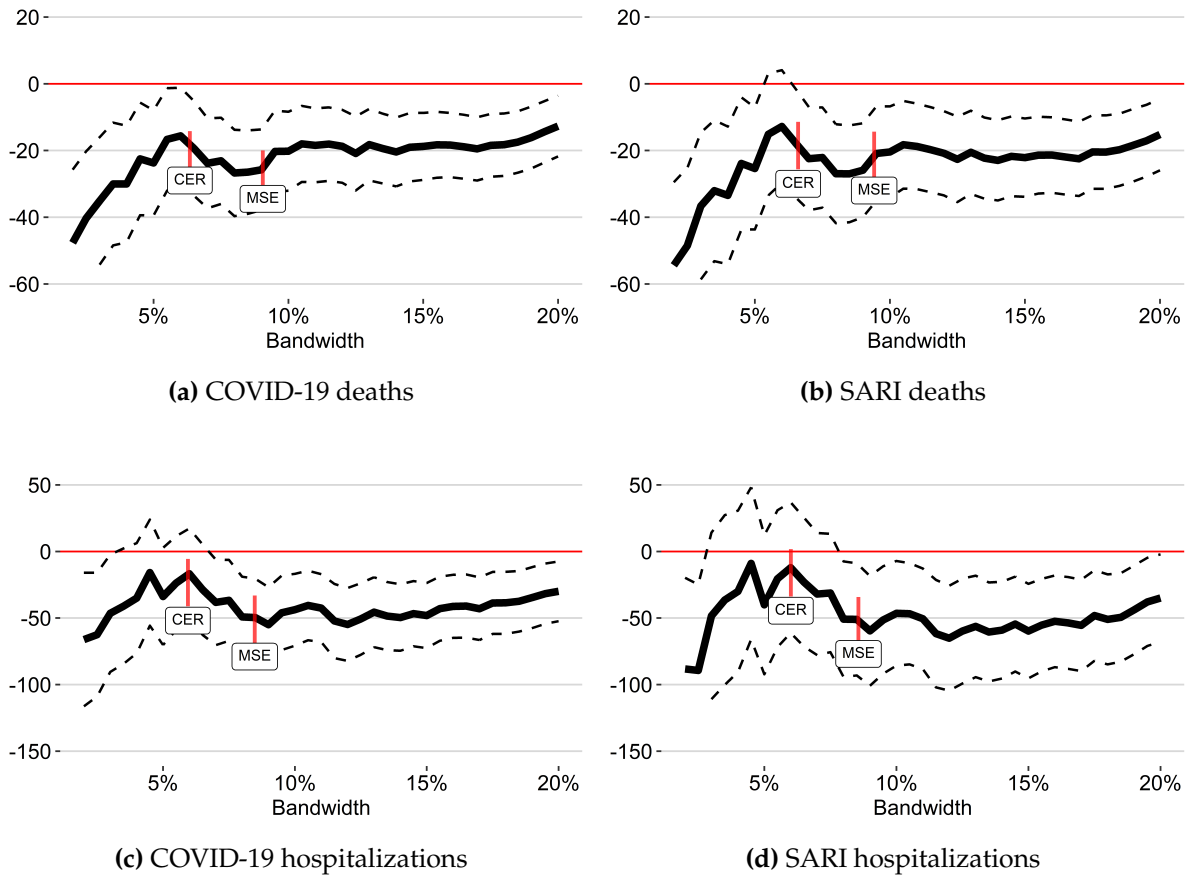

*Notes:* This figure displays the bandwidth robustness tests for the effect of female mayors on the number of deaths and hospitalizations by COVID-19 and SARI. Variables are measured in numbers per hundred thousand inhabitants in 2020. Note that COVID-19 numbers are a subset of SARI numbers. Subfigure (a) presents estimates for COVID-19 deaths. Subfigure (b) presents the estimates for SARI deaths. Subfigure (c) presents the estimates for COVID-19 hospitalizations. Subfigure (d) presents the estimates for SARI hospitalizations. We use a linear polynomial and a uniform kernel RD specification. CER and MSE optimal bandwidths are indicated in the figures (Calonico et al., 2014). Following this same work, 90% robust-bias corrected intervals are displayed. All estimates account for state fixed-effects following Equation 1.

**Figure A4: Placebo tests around the threshold**

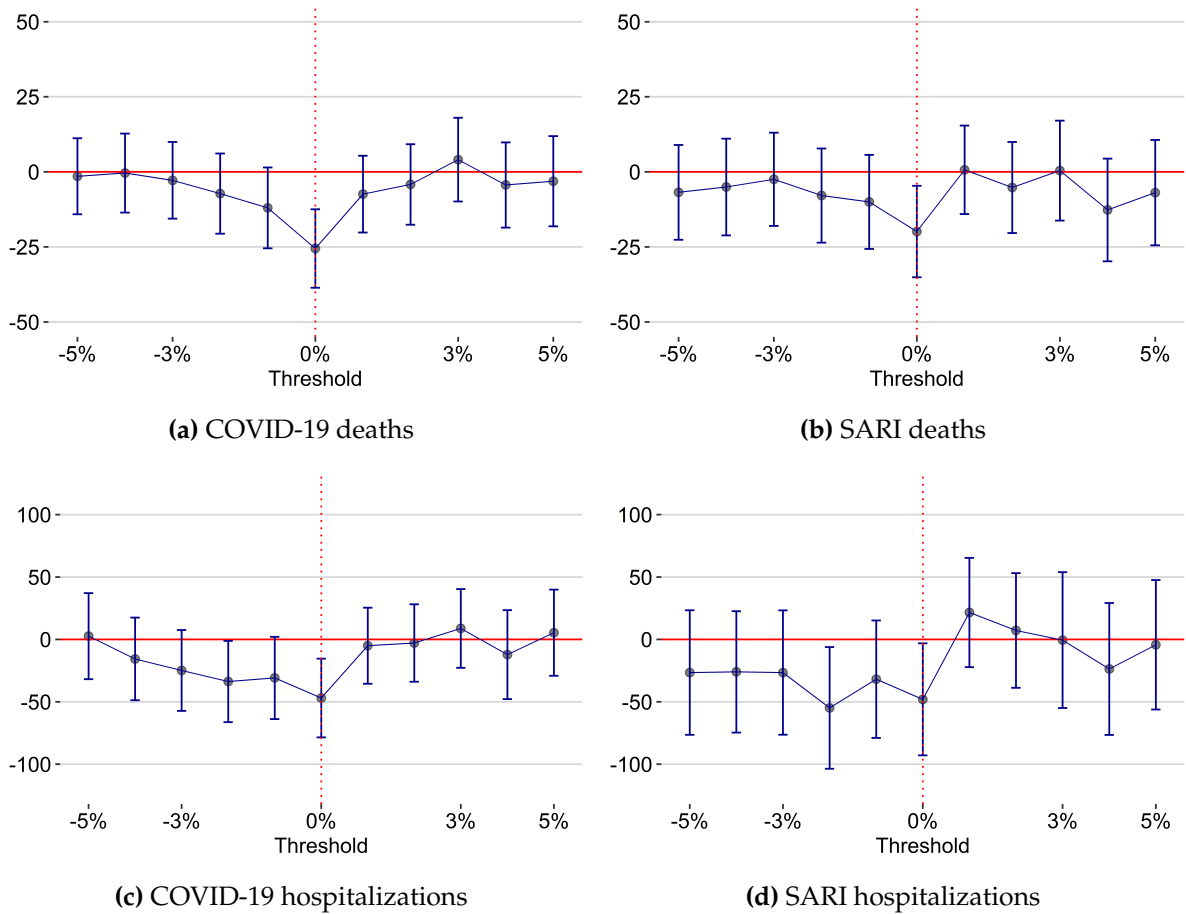

*Notes:* This figure displays the effect of female mayors on the number of deaths and hospitalizations by COVID-19 and SARI for different (and placebo) cutoffs. Variables are measured in numbers per hundred thousand inhabitants in 2020. Note that COVID-19 numbers are a subset of SARI numbers. Subfigure (a) presents estimates for COVID-19 deaths. Subfigure (b) presents the estimates for SARI deaths. Subfigure (c) presents the estimates for COVID-19 hospitalizations. Subfigure (d) presents the estimates for SARI hospitalizations. We use a linear polynomial and a uniform kernel RD specification. Optimal bandwidths following [Calonico et al. \(2014\)](#) were chosen to minimize the mean squared error of the local polynomial RD point estimator. Following that same work, 90% robust-bias corrected intervals are displayed. All estimates account for state fixed-effects following Equation 1.

**Figure A5: NPIs RD Plots**

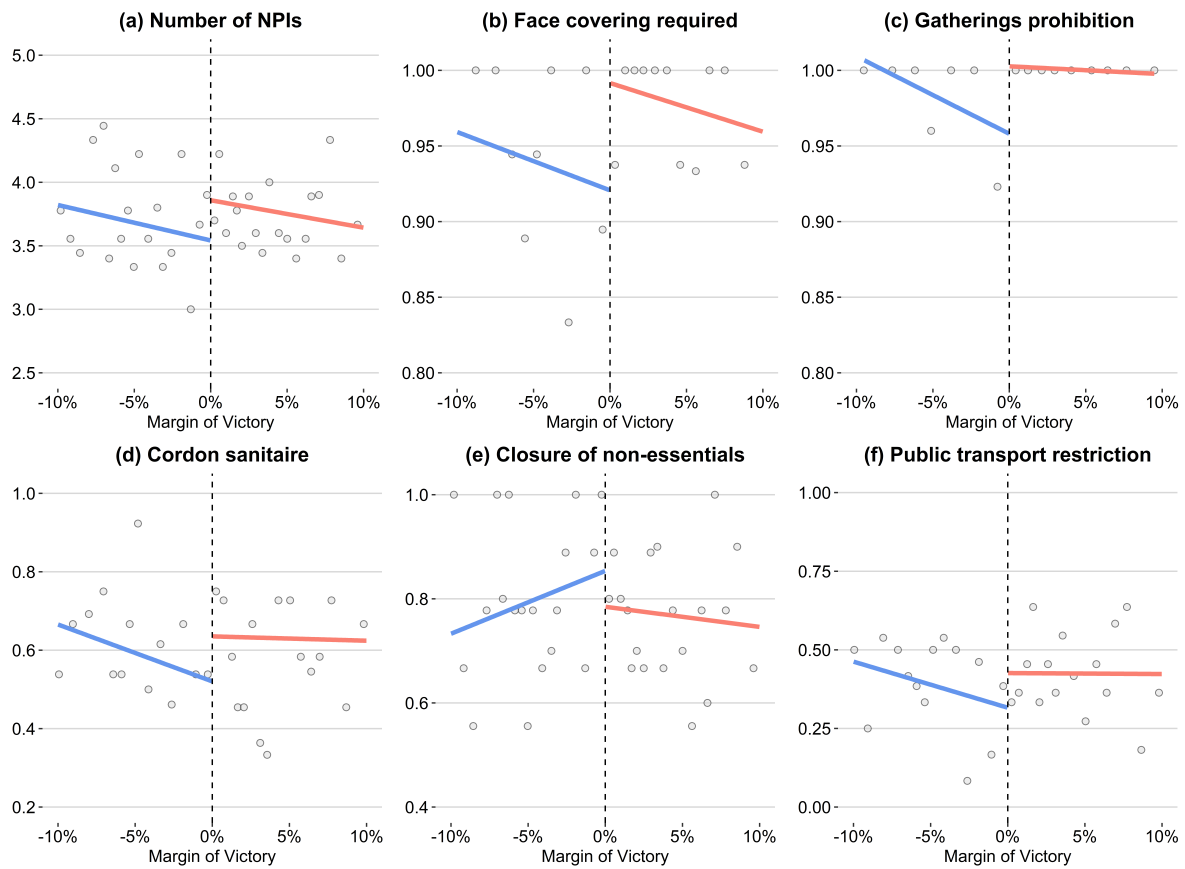

*Notes:* This figure displays the RD plots for the effect of female mayors in Brazilian municipalities on several non-pharmaceutical interventions outcomes. Figure (a) displays the results for the total number of NPIs adopted; (b) for the adoption of face covering requirement; (c) for the prohibition of gatherings; (d) for the adoption of a *cordon sanitaire*; (e) for the closure of non-essential business; and (f) for the restriction of public transportation. Plots were generated accordingly to [Calonico et al. \(2015\)](#). We use a linear specification and a uniform kernel. Following [Calonico et al. \(2014\)](#), the optimal bandwidths were chosen to minimize the mean squared error of the local polynomial RD point estimator. All estimates account for state fixed-effects following Equation 1. For more details on these estimates see 2 Panel B.

**Figure A6: NPIs Bandwidth Robustness**

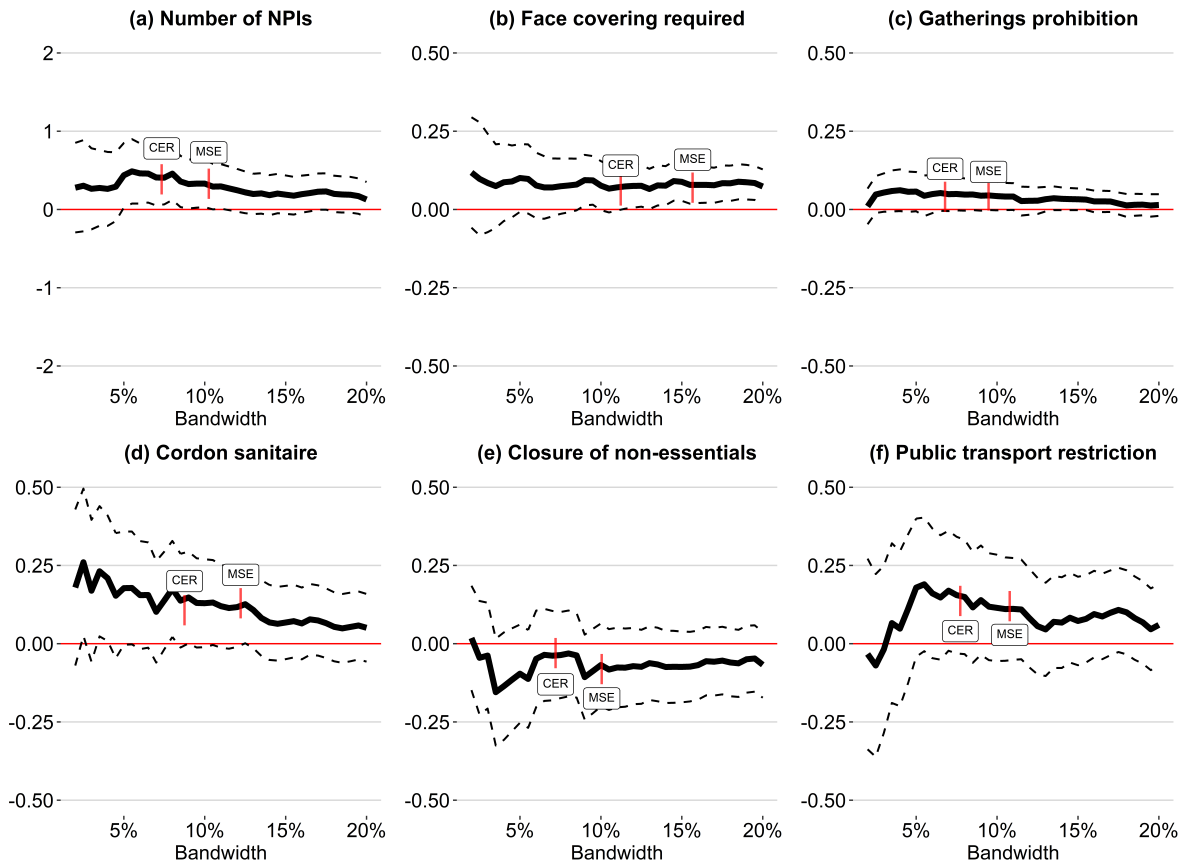

*Notes:* This figure displays the bandwidth robustness tests for the effect of female mayors in Brazilian municipalities on several non-pharmaceutical interventions outcomes. We use a linear polynomial and uniform kernel RD specification, while varying the bandwidth. Figure (a) displays the results for the total number of NPIs adopted; (b) for the adoption of face covering requirement; (c) for the prohibition of gatherings; (d) for the adoption of a *cordon sanitaire*; (e) for the closure of non-essential business; and (f) for the restriction of public transportation. CER and MSE optimal bandwidths are indicated in the figures (Calonico et al., 2014). Following this same work, 90% robust-bias corrected confidence intervals are displayed. All estimates account for state fixed-effects following Equation 1.

**Figure A7: NPIs Placebo Thresholds**

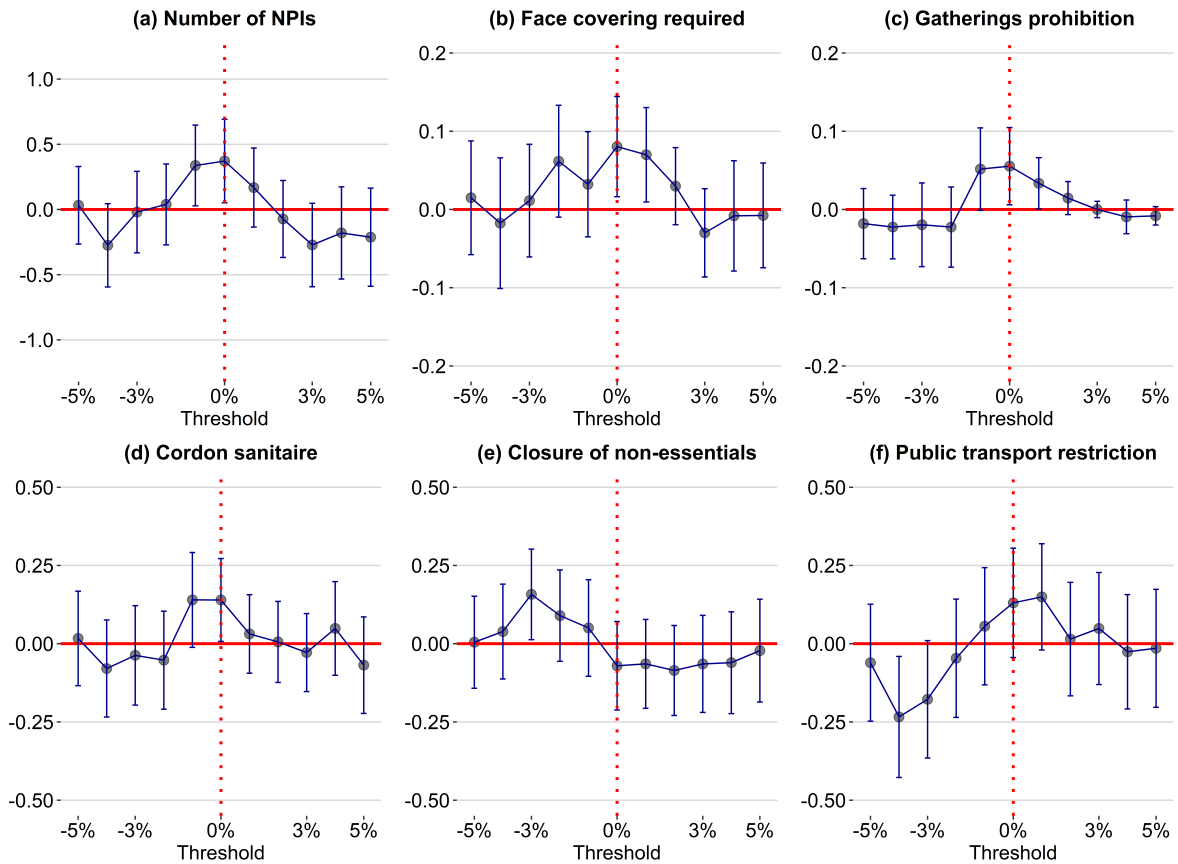

*Notes:* This figure displays the effect of female mayors in Brazilian municipalities on several non-pharmaceutical interventions outcomes for different (and placebo) cutoffs. Figure (a) displays the results for the total number of NPIs adopted; (b) for the adoption of face covering requirement; (c) for the prohibition of gatherings; (d) for the adoption of a *cordon sanitaire*; (e) for the closure of non-essential business; and (f) for the restriction of public transportation. We use a linear polynomial and uniform kernel RD specification. Optimal bandwidths following [Calonico et al. \(2014\)](#) were chosen to minimize the mean squared error of the local polynomial RD point estimator. Following that same work, 90% robust-bias corrected confidence intervals are displayed. All estimates account for state fixed-effects following Equation 1.

## Tables



**Table A1:** Data Description: Epidemiological and policy outcomes

| Variable                                          | Description                                                                                | Source                  |
|---------------------------------------------------|--------------------------------------------------------------------------------------------|-------------------------|
| COVID-19 deaths per 100k pop.                     | Number of COVID-19 deaths in 2020                                                          | SIVEP <sup>1</sup>      |
| COVID-19 hospitalizations per 100k pop.           | Number of COVID-19 hospitalizations in 2020                                                | SIVEP                   |
| SARI deaths per 100k pop.                         | Number of SARI deaths in 2020                                                              | SIVEP                   |
| SARI hospitalizations per 100k pop.               | Number of SARI hospitalizations in 2020                                                    | SIVEP                   |
| Number of NPIs                                    | Total number of adopted NPIs until July 2020                                               | CNM-Survey <sup>2</sup> |
| Face covering required                            | Dummy indicating adoption until July 2020                                                  | CNM-Survey              |
| Gatherings prohibition                            | Dummy indicating adoption until July 2020                                                  | CNM-Survey              |
| <i>Cordon sanitaire</i>                           | Dummy indicating adoption until July 2020                                                  | CNM-Survey              |
| Closure of non-essentials                         | Dummy indicating adoption until July 2020                                                  | CNM-Survey              |
| Public transport restriction                      | Dummy indicating adoption until July 2020                                                  | CNM-Survey              |
| $\Delta$ Health municipal spending (2016-19)      | Share of total municipal spending dedicated to health issues (variation from 2016 to 2019) | SICONFI <sup>3</sup>    |
| $\Delta$ Hosp. beds per 100k pop. (2017-2020)     | Total hosp. beds variation from Jan 2017 to Jan 2020                                       | CNES <sup>4</sup>       |
| $\Delta$ ICU beds per 100k pop. (2017-2020)       | ICU beds variation from Jan 2017 to Jan 2020                                               | CNES                    |
| $\Delta$ Health municipal spending (2019-2020)    | Share of total municipal spending dedicated to health issues (variation from 2019 to 2020) | SICONFI                 |
| $\Delta$ Hosp. beds per 100k pop. (Fev-Dec20)     | Total hosp. beds variation from Feb 2020 to Dec 2020                                       | CNES                    |
| $\Delta$ ICU hosp. beds per 100k pop. (Fev-Dec20) | ICU beds variation from Feb 2020 to Dec 2020                                               | CNES                    |
| Mayor's years of schooling                        | Mayor's years of schooling when elected                                                    | TSE <sup>5</sup>        |
| Mayor's Age                                       | Mayor's years of age when elected                                                          | TSE                     |
| Healthcare professional                           | Dummy indicating if the mayor is a healthcare professional                                 | TSE                     |
| Mayor's party ideology*                           | Mayor's party ideology index when elected. Varies from -1 (far-left) to 1 (far-right)      | BLS <sup>6</sup>        |

Notes: All variables are aggregated at the municipal level.

\* This variable differs from the Ideology Index shown in Table A2 Panel C. The former measures the mayor's party ideology; the second is a measure of municipal ideology.

<sup>1</sup> *Sistema de Informação de Vigilância de Gripe* (Flu Surveillance Information System) from the Brazilian Ministry of Health.

<sup>2</sup> *Survey da Confederação Nacional dos Municípios* (Brazilian Confederation of Municipalities survey) (de Souza Santos et al., 2021)

<sup>3</sup> *Sistema de Informações Contábeis e Fiscais do Setor Público Brasileiro* (Brazilian Public Sector Accounting and Tax Information System) from the Brazilian National Treasury.

<sup>4</sup> *Cadastro Nacional de Estabelecimentos de Saúde* (National Register of Health Establishments) from the Brazilian Ministry of Health.

<sup>5</sup> *Tribunal Superior Eleitoral* (Brazilian Electoral Court), the Brazilian electoral authority.

<sup>6</sup> The Brazilian legislative survey (Power and Rodrigues-Silveira, 2019).

**Table A2: Data Description: Baseline Covariates**

| Variable                                            | Description                                                                             | Source                        |
|-----------------------------------------------------|-----------------------------------------------------------------------------------------|-------------------------------|
| <b>Panel A: Hospitalization and health outcomes</b> |                                                                                         |                               |
| Municipal health spending                           | Avg. share of municipal spending dedicated to health issues across 2013-16              | SICONFI <sup>1</sup>          |
| Hosp. beds per 100k pop.                            | Total hosp. beds in Jan 2017                                                            | CNES <sup>2</sup>             |
| Num. of Medical Doctors per 100k pop.               | Number of MDs in 2014                                                                   | IBGE <sup>3</sup>             |
| Municipal health council                            | Dummy indicating the existence in 2014                                                  | IBGE                          |
| Municipal health fund                               | Dummy indicating the existence in 2014                                                  | IBGE                          |
| Community health agents program                     | Dummy indicating the existence in 2014                                                  | IBGE                          |
| Emergency care services                             | Dummy indicating the existence in 2014                                                  | IBGE                          |
| Has health surveillance services                    | Dummy indicating the existence in 2014                                                  | IBGE                          |
| Epidemiological surveillance services               | Dummy indicating the existence in 2014                                                  | IBGE                          |
| Has communication channel                           | Dummy indicating the existence in 2014                                                  | IBGE                          |
| <b>Panel B: Sociodemographic characteristics</b>    |                                                                                         |                               |
| Population                                          | Estimated population in 2020                                                            | IBGE                          |
| Population density                                  | Estimated population density in 2020                                                    | IBGE                          |
| Urban pop. rate                                     | Fraction of municipal population regarded as urban in 2017                              | IBGE                          |
| Average yearly income                               | GDP per capita in 2018                                                                  | IBGE                          |
| Literacy rate                                       | % of literate pop. in 2010                                                              | IBGE 2010 Census <sup>4</sup> |
| Pop. % with 55+ years of age                        | % of pop. with 55+ years of age in 2010                                                 | IBGE 2010 Census              |
| Pop. % with 8+ years of schooling                   | % of pop. with 8+ years of schooling in 2010                                            | IBGE 2010 Census              |
| % Male pop.                                         | % of pop. that was male in 2010                                                         | IBGE 2010 Census              |
| % Black pop.                                        | % of black pop. in 2010                                                                 | IBGE 2010 Census              |
| Municipal guard staff per 100k pop.                 | Number of municipal guards in 2014                                                      | IBGE                          |
| <b>Panel C: Political characteristics</b>           |                                                                                         |                               |
| Bolsonaro % valid votes (first round)               | Bolsonaro's vote-share in the 2018 Brazilian presidential first round election          | TSE                           |
| Bolsonaro % valid votes (second round)              | Bolsonaro's vote-share in the 2018 Brazilian presidential second round election         | TSE <sup>5</sup>              |
| Ideology Index*                                     | Municipal ideological score in 2016. Varies from -1 (far-left) to 1 (far-right)         | TSE/BLS <sup>6</sup>          |
| Elected mayor was the incumbent                     | Dummy indicating if the elected candidate was the incumbent                             | TSE                           |
| Elected mayor was from some party**                 | Ten different dummies each indicating if the elected candidate was from a given party** | TSE                           |

Notes: All variables are aggregated at the municipal level.

\* This variable differs from the "Mayor's party ideology" shown in Table A1. The former measures municipal ideology; the second measures the mayor's party ideology.

\*\* DEM, PDT, PMDB, PP, PR, PSB, PSD, PSDB, PT or PTB.

<sup>1</sup> *Sistema de Informações Contábeis e Fiscais do Setor Público Brasileiro* (Brazilian Public Sector Accounting and Tax Information System) from the Brazilian National Treasury.

<sup>2</sup> *Cadastro Nacional de Estabelecimentos de Saúde* (National Register of Health Establishments) from the Brazilian Ministry of Health.

<sup>3</sup> *Instituto Brasileiro de Geografia e Estatística* (Brazil's National Bureau of Statistics).

<sup>4</sup> IBGE's demographic census in 2010. It is the most recent available country-covering census in Brazil.

<sup>5</sup> *Tribunal Superior Eleitoral* (Brazilian Electoral Court), the Brazilian electoral authority.

<sup>6</sup> The Brazilian legislative survey (Power and Rodrigues-Silveira, 2019).

**Table A3: Summary Statistics: Epidemiological and policy outcomes**

| Variable                                                     | Male |        |        | Female |        |        | Full Sample |         |         |         |         |
|--------------------------------------------------------------|------|--------|--------|--------|--------|--------|-------------|---------|---------|---------|---------|
|                                                              | N    | Mean   | Sd     | N      | Mean   | Sd     | Mean        | Sd      | Min     | Median  | Max     |
| COVID-19 deaths per 100k pop.                                | 686  | 58.69  | 47.02  | 528    | 57.47  | 47.3   | 58.16       | 47.13   | 0       | 48.8    | 358.79  |
| COVID-19 hospitalizations per 100k pop.                      | 686  | 154.53 | 129.44 | 528    | 149.4  | 125.31 | 152.3       | 127.63  | 0       | 124.69  | 1299.44 |
| SARI deaths per 100k pop.                                    | 686  | 80.73  | 59.36  | 528    | 79.05  | 56.12  | 58.16       | 47.13   | 0       | 48.8    | 358.79  |
| SARI hospitalizations per 100k pop.                          | 686  | 260.14 | 194.06 | 528    | 252.96 | 191.91 | 152.3       | 127.63  | 0       | 124.69  | 1299.44 |
| Number of NPIs                                               | 454  | 3.72   | 0.93   | 339    | 3.76   | 0.89   | 3.74        | 0.91    | 0       | 4       | 5       |
| Face covering required                                       | 452  | 0.96   | 0.18   | 337    | 0.97   | 0.17   | 0.97        | 0.18    | 0       | 1       | 1       |
| Gatherings prohibition                                       | 452  | 0.97   | 0.17   | 338    | 1      | 0.05   | 0.98        | 0.13    | 0       | 1       | 1       |
| Cordon Sanitaire                                             | 454  | 0.59   | 0.49   | 339    | 0.6    | 0.49   | 0.59        | 0.49    | 0       | 1       | 1       |
| Closure of non-essentials                                    | 452  | 0.79   | 0.41   | 338    | 0.77   | 0.42   | 0.78        | 0.41    | 0       | 1       | 1       |
| Public transport restriction                                 | 445  | 0.43   | 0.5    | 333    | 0.43   | 0.5    | 0.43        | 0.5     | 0       | 0       | 1       |
| $\Delta$ Health per capita spending (2016 to 2019)           | 665  | 141.89 | 136.01 | 500    | 153.46 | 152.72 | 146.86      | 143.47  | -611.95 | 127.07  | 1287.9  |
| $\Delta$ Hosp. beds per 100k pop. (Jan 2017 to Jan 2020)     | 688  | -2.11  | 69.32  | 532    | -2.7   | 50.29  | -2.37       | 61.73   | -448.37 | 0       | 1204.2  |
| $\Delta$ ICU hosp. beds per 100k pop. (Jan 2017 to Jan 2020) | 688  | 0.09   | 1.36   | 532    | 0.12   | 2.09   | 0.1         | 1.72    | -14.79  | 0       | 33.66   |
| $\Delta$ Health per capita spending (2019 to 2020)           | 573  | 185.26 | 129.14 | 422    | 187.44 | 186.19 | 149.51      | -977.27 | 166.96  | 1737.22 |         |
| $\Delta$ Hosp. beds per 100k pop. (Feb 2020 to Dec 2020)     | 689  | 5.76   | 35.54  | 533    | 4.65   | 31.8   | 5.28        | 33.95   | -475.51 | 0       | 338.84  |
| $\Delta$ ICU hosp. beds per 100k pop. (Feb 2020 to Dec 2020) | 689  | 0.72   | 4.85   | 533    | 0.47   | 3.65   | 0.61        | 4.36    | -1.91   | 0       | 67.65   |
| Mayor's years of schooling                                   | 689  | 13.24  | 3.39   | 533    | 14.78  | 2.26   | 13.91       | 3.05    | 0       | 16      | 16      |
| Mayor's Age                                                  | 689  | 48.63  | 10.96  | 533    | 47.84  | 10.3   | 48.29       | 10.68   | 21      | 48      | 88      |
| Healthcare professional                                      | 689  | 0.08   | 0.27   | 533    | 0.1    | 0.3    | 0.09        | 0.29    | 0       | 0       | 1       |
| Mayor's party ideology                                       | 689  | 0.28   | 0.37   | 533    | 0.29   | 0.36   | 0.28        | 0.37    | -0.84   | 0.42    | 0.76    |

Notes: This table reports the summary statistics for our epidemiological and policy outcomes. Variables' description in Table A1.

**Table A4: Summary Statistics: Baseline Covariates**

| Variable                                            | Male |         |          | Female |         |         | Full Sample |          |         |          |           |
|-----------------------------------------------------|------|---------|----------|--------|---------|---------|-------------|----------|---------|----------|-----------|
|                                                     | N    | Mean    | Sd       | N      | Mean    | Sd      | Mean        | Sd       | Min     | Median   | Max       |
| <i>Panel A: Hospitalization and health outcomes</i> |      |         |          |        |         |         |             |          |         |          |           |
| Municipal health spending (share of total spd.)     | 684  | 0.23    | 0.04     | 527    | 0.24    | 0.04    | 0.23        | 0.04     | 0.03    | 0.23     | 0.5       |
| Hosp. beds per 100k pop.                            | 688  | 127.6   | 156.26   | 532    | 127.19  | 150.83  | 127.42      | 153.86   | 0       | 100.98   | 1415.12   |
| Num. of Medical Doctors per 100k pop.               | 684  | 81.28   | 64.67    | 529    | 85.27   | 62.04   | 83.02       | 63.54    | 0       | 67.91    | 715.91    |
| Municipal health council                            | 689  | 1       | 0.05     | 533    | 1       | 0       | 1           | 0.04     | 0       | 1        | 1         |
| Municipal health fund                               | 689  | 1       | 0        | 533    | 1       | 0       | 1           | 0        | 1       | 1        | 1         |
| Community health agents program                     | 689  | 0.73    | 0.45     | 533    | 0.72    | 0.45    | 0.73        | 0.45     | 0       | 1        | 1         |
| Emergency care services                             | 689  | 0.85    | 0.36     | 533    | 0.87    | 0.33    | 0.86        | 0.35     | 0       | 1        | 1         |
| Has health surveillance services                    | 689  | 0.99    | 0.09     | 533    | 0.99    | 0.1     | 0.99        | 0.09     | 0       | 1        | 1         |
| Epidemiological surveillance services               | 683  | 0.95    | 0.21     | 528    | 0.97    | 0.18    | 0.96        | 0.2      | 0       | 1        | 1         |
| Has communication channel                           | 689  | 0.97    | 0.18     | 533    | 0.97    | 0.17    | 0.97        | 0.18     | 0       | 1        | 1         |
| <i>Panel B: Sociodemographic characteristics</i>    |      |         |          |        |         |         |             |          |         |          |           |
| Population                                          | 689  | 30117.4 | 121440.7 | 533    | 23933.4 | 43106.7 | 27420.09    | 95546.05 | 1118    | 11320.5  | 2886698   |
| Population density                                  | 689  | 96.9    | 540      | 533    | 90.7    | 306.3   | 94.17       | 453.01   | 0.04    | 24.69    | 11670.9   |
| Urban pop. rate                                     | 689  | 46.33   | 33.73    | 533    | 46.93   | 33.34   | 46.59       | 33.55    | 0       | 52.54    | 98.6      |
| Average yearly income                               | 689  | 21748.9 | 24653.3  | 533    | 22080.9 | 33115   | 21893.7     | 28640.83 | 5062.94 | 14119.61 | 583171.85 |
| Literacy rate                                       | 689  | 0.814   | 0.099    | 533    | 0.816   | 0.094   | 0.81        | 0.1      | 0.53    | 0.82     | 0.98      |
| Pop. % with 55+ years of age                        | 689  | 0.158   | 0.041    | 533    | 0.158   | 0.039   | 0.16        | 0.04     | 0.05    | 0.16     | 0.31      |
| Pop. % with 8+ years of schooling                   | 689  | 0.336   | 0.091    | 533    | 0.337   | 0.085   | 0.34        | 0.09     | 0.12    | 0.33     | 0.66      |
| % Male pop.                                         | 689  | 0.507   | 0.016    | 533    | 0.506   | 0.015   | 0.51        | 0.02     | 0.46    | 0.51     | 0.59      |
| % Black pop.                                        | 689  | 0.571   | 0.223    | 533    | 0.571   | 0.219   | 0.57        | 0.22     | 0.02    | 0.63     | 0.93      |
| Municipal guard staff per 100k pop.                 | 687  | 20.16   | 58.33    | 531    | 28.41   | 80.04   | 23.76       | 68.74    | 0       | 0        | 660.35    |
| <i>Panel C: Political characteristics</i>           |      |         |          |        |         |         |             |          |         |          |           |
| Bolsonaro % valid votes (first round)               | 689  | 0.349   | 0.196    | 533    | 0.348   | 0.187   | 0.35        | 0.19     | 0.03    | 0.32     | 0.81      |
| Bolsonaro % valid votes (second round)              | 689  | 0.418   | 0.231    | 533    | 0.417   | 0.22    | 0.42        | 0.23     | 0.04    | 0.38     | 0.88      |
| Ideology Index                                      | 689  | 0.23    | 0.13     | 533    | 0.23    | 0.13    | 0.23        | 0.13     | -0.32   | 0.24     | 0.64      |
| Elected mayor was the incumbent                     | 633  | 0.27    | 0.44     | 500    | 0.22    | 0.41    | 0.25        | 0.43     | 0       | 0        | 1         |

Notes: This table reports the summary statistics for our baseline covariates. For parties' variables summary statistics see Table A6. For covariates variables description see Table A2.

**Table A5: Formal Continuity-Based Analysis for Covariates (Full Mixed Races Sample)\***

| Variable                                                   | RD        | Robust Inference |                     | CCT-Optimal | Eff. Number  |
|------------------------------------------------------------|-----------|------------------|---------------------|-------------|--------------|
|                                                            | Estimator | p-value          | Conf. Int.          | Bandwidth   | Observations |
| <b><i>Panel A: Hospitalization and health outcomes</i></b> |           |                  |                     |             |              |
| Municipal health spending (share of total spd.)            | 0.006     | 0.333            | [-0.0063, 0.0185]   | 10.685      | 577          |
| Hosp. beds per 100k pop.                                   | 14.967    | 0.501            | [-28.6405, 58.5744] | 10.167      | 558          |
| Num. of Medical Doctors per 100k pop.                      | -0.627    | 0.942            | [-17.5521, 16.2974] | 14.914      | 752          |
| Municipal health council                                   | 0.011     | 0.227            | [-0.0068, 0.0286]   | 13.580      | 702          |
| Community health agents program                            | -0.064    | 0.346            | [-0.197, 0.0691]    | 12.605      | 651          |
| Emergency care services                                    | 0.012     | 0.813            | [-0.0882, 0.1123]   | 12.843      | 667          |
| Has health surveillance services                           | 0.000     | 0.982            | [-0.0315, 0.0322]   | 14.850      | 757          |
| Epidemiological surveillance services                      | 0.020     | 0.499            | [-0.0385, 0.079]    | 13.793      | 701          |
| Has communication channel                                  | -0.011    | 0.675            | [-0.0604, 0.0391]   | 14.818      | 755          |
| <b><i>Panel B: Sociodemographic characteristics</i></b>    |           |                  |                     |             |              |
| Log pop.                                                   | -0.180    | 0.302            | [-0.5215, 0.1617]   | 8.853       | 502          |
| Log pop. density                                           | 0.126     | 0.535            | [-0.2713, 0.523]    | 9.577       | 537          |
| Urban pop. rate                                            | -5.367    | 0.274            | [-14.9861, 4.2524]  | 14.669      | 749          |
| Log average yearly income                                  | -0.040    | 0.614            | [-0.1943, 0.1148]   | 10.510      | 580          |
| Literacy rate                                              | -0.008    | 0.360            | [-0.0238, 0.0087]   | 11.537      | 612          |
| Pop. % with 55+ years of age                               | -0.003    | 0.595            | [-0.0117, 0.0067]   | 12.830      | 667          |
| Pop. % with 8+ years of schooling                          | -0.002    | 0.840            | [-0.0239, 0.0194]   | 10.686      | 584          |
| % Male pop.                                                | -0.004    | 0.175            | [-0.0091, 0.0017]   | 9.837       | 548          |
| % Black pop.                                               | 0.017     | 0.368            | [-0.0194, 0.0524]   | 9.880       | 549          |
| Municipal Guard staff per 100k pop.                        | -15.579   | 0.161            | [-37.357, 6.199]    | 11.361      | 601          |
| <b><i>Panel C: Political characteristics</i></b>           |           |                  |                     |             |              |
| Bolsonaro % valid votes (first round)                      | -0.009    | 0.599            | [-0.0408, 0.0236]   | 10.899      | 591          |
| Bolsonaro % valid votes (second round)                     | -0.014    | 0.420            | [-0.0495, 0.0206]   | 10.750      | 586          |
| Ideology Index                                             | 0.024     | 0.250            | [-0.017, 0.0654]    | 10.765      | 586          |
| Elected mayor was the incumbent                            | -0.042    | 0.599            | [-0.1991, 0.115]    | 10.389      | 530          |

*Notes:* This table displays the RD balance test for our baseline covariates. For each indicated variable we run a RD with linear polynomial and uniform kernel specification. Optimal bandwidths following [Calonico et al. \(2014\)](#) were chosen to minimize the mean squared error of the local polynomial RD point estimator. Following that same work, we report robust-bias corrected p-values and 95% CIs. All estimates account for state fixed-effects following Equation 1. Variables' description are in Table A2.

\* For the RD balance test for the parties' dummies see Table A7.

**Table A6: Summary Statistics: Parties' variables**

| Party | Male |      |      | Female |      |      | Full Sample |      |     |        |     |
|-------|------|------|------|--------|------|------|-------------|------|-----|--------|-----|
|       | N    | Mean | Sd   | N      | Mean | Sd   | Mean        | Sd   | Min | Median | Max |
| DEM   | 689  | 0.05 | 0.21 | 533    | 0.06 | 0.23 | 0.05        | 0.22 | 0   | 0      | 1   |
| PDT   | 689  | 0.06 | 0.23 | 533    | 0.05 | 0.23 | 0.06        | 0.23 | 0   | 0      | 1   |
| PMDB  | 689  | 0.18 | 0.38 | 533    | 0.2  | 0.4  | 0.18        | 0.39 | 0   | 0      | 1   |
| PP    | 689  | 0.09 | 0.29 | 533    | 0.08 | 0.26 | 0.09        | 0.28 | 0   | 0      | 1   |
| PR    | 689  | 0.06 | 0.23 | 533    | 0.08 | 0.27 | 0.07        | 0.25 | 0   | 0      | 1   |
| PSB   | 689  | 0.08 | 0.26 | 533    | 0.08 | 0.27 | 0.08        | 0.27 | 0   | 0      | 1   |
| PSD   | 689  | 0.1  | 0.3  | 533    | 0.11 | 0.31 | 0.1         | 0.3  | 0   | 0      | 1   |
| PSDB  | 689  | 0.15 | 0.36 | 533    | 0.13 | 0.34 | 0.14        | 0.35 | 0   | 0      | 1   |
| PT    | 689  | 0.04 | 0.19 | 533    | 0.05 | 0.21 | 0.04        | 0.2  | 0   | 0      | 1   |
| PTB   | 689  | 0.04 | 0.2  | 533    | 0.05 | 0.22 | 0.05        | 0.21 | 0   | 0      | 1   |

*Notes:* This table displays summary statistics for parties' dummies variables. Each party dummy indicates if the elected mayor in 2016 municipal election was from a given party.

**Table A7: Parties Balance Table**

| Party | RD        | Robust Inference |                   | CCT-Optimal | Eff. Number  |
|-------|-----------|------------------|-------------------|-------------|--------------|
|       | Estimator | p-value          | Conf. Int.        | Bandwidth   | Observations |
| DEM   | 0.031     | 0.400            | [-0.0416, 0.1041] | 9.911       | 549          |
| PDT   | -0.026    | 0.529            | [-0.1051, 0.054]  | 12.325      | 636          |
| PMDB  | 0.009     | 0.867            | [-0.1011, 0.12]   | 12.107      | 629          |
| PP    | 0.079     | 0.100            | [-0.0153, 0.1742] | 9.884       | 549          |
| PR    | 0.022     | 0.635            | [-0.0679, 0.1112] | 8.136       | 474          |
| PSB   | -0.071    | 0.203            | [-0.1793, 0.038]  | 10.040      | 554          |
| PSD   | 0.062     | 0.161            | [-0.0248, 0.1495] | 14.414      | 737          |
| PSDB  | 0.030     | 0.601            | [-0.0828, 0.1431] | 11.369      | 602          |
| PT    | 0.003     | 0.910            | [-0.0524, 0.0588] | 14.512      | 742          |
| PTB   | -0.055    | 0.117            | [-0.1248, 0.0139] | 9.548       | 536          |

*Notes:* This table displays the RD balance test for the parties' dummies variables. Each party variable is a dummy indicating if the elected mayor in 2016 municipal election was from a given party. For each of these variables we run a RD with linear polynomial and uniform kernel specification. Optimal bandwidths following [Calonico et al. \(2014\)](#) were chosen to minimize the mean squared error of the local polynomial RD point estimator. Following that same work, we report robust-bias corrected p-values and 95% CIs. All estimates account for state fixed-effects following Equation 1. Variables' description are in Table A2 Panel C.

**Table A8: States Balance Table**

| State | RD        | Robust Inference |                   | CCT-Optimal | Eff. Number  |
|-------|-----------|------------------|-------------------|-------------|--------------|
|       | Estimator | p-value          | Conf. Int.        | Bandwidth   | Observations |
| AC    | -0.001    | 0.924            | [-0.0248, 0.0225] | 18.067      | 849          |
| AL    | 0.018     | 0.489            | [-0.0335, 0.0701] | 14.048      | 722          |
| AM    | -0.015    | 0.387            | [-0.0489, 0.019]  | 12.102      | 628          |
| AP    | 0.010     | 0.467            | [-0.0168, 0.0366] | 16.398      | 814          |
| BA    | -0.068    | 0.135            | [-0.1569, 0.0211] | 14.130      | 724          |
| CE    | 0.019     | 0.547            | [-0.0431, 0.0814] | 14.160      | 724          |
| ES    | -0.010    | 0.428            | [-0.0356, 0.0151] | 7.934       | 470          |
| GO    | 0.044     | 0.168            | [-0.0184, 0.1056] | 10.775      | 586          |
| MA    | 0.029     | 0.490            | [-0.0534, 0.1115] | 12.504      | 647          |
| MG    | 0.045     | 0.355            | [-0.0504, 0.1407] | 12.862      | 668          |
| MS    | -0.009    | 0.601            | [-0.0449, 0.026]  | 12.458      | 644          |
| MT    | -0.052    | 0.102            | [-0.1146, 0.0104] | 11.333      | 601          |
| PA    | -0.041    | 0.159            | [-0.0981, 0.0161] | 15.163      | 772          |
| PB    | -0.016    | 0.693            | [-0.0975, 0.0649] | 10.684      | 584          |
| PE    | -0.035    | 0.308            | [-0.1031, 0.0325] | 12.283      | 636          |
| PI    | -0.039    | 0.264            | [-0.1074, 0.0294] | 18.713      | 868          |
| PR    | 0.037     | 0.206            | [-0.0201, 0.0933] | 11.240      | 600          |
| RJ    | 0.020     | 0.255            | [-0.0144, 0.0545] | 10.185      | 561          |
| RN    | 0.019     | 0.623            | [-0.0573, 0.0956] | 13.296      | 692          |
| RO    | -0.025    | 0.139            | [-0.059, 0.0082]  | 13.618      | 702          |
| RR    | -0.016    | 0.277            | [-0.0448, 0.0128] | 8.086       | 473          |
| RS    | -0.009    | 0.816            | [-0.0803, 0.0633] | 12.992      | 679          |
| SC    | 0.012     | 0.714            | [-0.0529, 0.0773] | 14.343      | 734          |
| SE    | 0.036     | 0.165            | [-0.0147, 0.0862] | 11.130      | 599          |
| SP    | 0.093     | 0.080*           | [-0.0111, 0.198]  | 10.421      | 568          |
| TO    | 0.011     | 0.622            | [-0.0327, 0.0548] | 11.208      | 599          |

*Notes:* This table displays the RD balance test for the state's dummies variables. Each state variable is a dummy indicating if the elected mayor in 2016 municipal election was from a given state. For each of these variables we run a RD with linear polynomial and uniform kernel specification. Optimal bandwidths following [Calonico et al. \(2014\)](#) were chosen to minimize the mean squared error of the local polynomial RD point estimator. Following that same work, we report robust-bias corrected p-values and 95% CIs. No controls are included.

**Table A9:** Impact of female leadership on health investment and non-pharmaceutical interventions, RDD estimates - Robustness using quadratic specification

| <i>Panel A: Investment in Health</i>             |                                                   |                                            |                                          |                                                   |                                            |                                          |
|--------------------------------------------------|---------------------------------------------------|--------------------------------------------|------------------------------------------|---------------------------------------------------|--------------------------------------------|------------------------------------------|
|                                                  | Pre-Outbreak                                      |                                            |                                          | Post-Outbreak                                     |                                            |                                          |
|                                                  | $\Delta$ Health spending<br>(share of total spd.) | $\Delta$ Total hosp. beds<br>per 100k pop. | $\Delta$ ICU hosp. beds<br>per 100k pop. | $\Delta$ Health spending<br>(share of total spd.) | $\Delta$ Total hosp. beds<br>per 100k pop. | $\Delta$ ICU hosp. beds<br>per 100k pop. |
| RD Estimator                                     | -0.001                                            | -9.549                                     | -0.375                                   | 0.004                                             | -3.64                                      | -0.212                                   |
| Robust p-value                                   | 0.934                                             | 0.35                                       | 0.228                                    | 0.752                                             | 0.554                                      | 0.785                                    |
| Robust conf. int.                                | [-0.02, 0.0184]                                   | [-29.572, 10.4732]                         | [-0.9849, 0.2352]                        | [-0.0219, 0.0303]                                 | [-15.7007, 8.4212]                         | [-1.7386, 1.3138]                        |
| CCT-Optimal BW                                   | 20.295                                            | 24.072                                     | 16.241                                   | 29.326                                            | 18.348                                     | 13.424                                   |
| Eff. Number Obs.                                 | 837                                               | 977                                        | 809                                      | 828                                               | 860                                        | 693                                      |
| <i>Panel B: Non-Pharmaceutical Interventions</i> |                                                   |                                            |                                          |                                                   |                                            |                                          |
| $\mathfrak{E}$                                   | Number of<br>NPIs                                 | Face covering<br>required                  | Gatherings<br>prohibition                | <i>Cordon<br/>sanitaire</i>                       | Closure of<br>non-essentials               | Public transport<br>restriction          |
| RD Estimator                                     | 0.308                                             | 0.086                                      | 0.068                                    | 0.141                                             | -0.106                                     | 0.109                                    |
| Robust p-value                                   | 0.168                                             | 0.058*                                     | 0.043**                                  | 0.144                                             | 0.253                                      | 0.321                                    |
| Robust conf. int.                                | [-0.1302, 0.7468]                                 | [-0.0031, 0.1752]                          | [0.0021, 0.1335]                         | [-0.0481, 0.3303]                                 | [-0.2875, 0.0757]                          | [-0.1068, 0.3257]                        |
| CCT-Optimal BW                                   | 17.295                                            | 27.093                                     | 20.06                                    | 20.231                                            | 15.186                                     | 21.621                                   |
| Eff. Number Obs.                                 | 533                                               | 658                                        | 567                                      | 572                                               | 487                                        | 589                                      |

*Notes:* This table reports our RD estimates of the association between female mayors and several outcomes. The level of observation is the municipality. Panel A reports results on health investment-related outcomes. This panel is divided into pre and post pandemic outbreak outcomes. In the first column of Panel A, the outcome is the variation in the share of municipal spending dedicated to health issues between 2016 and 2019. In the second column, the outcome is the variation of total hospital beds per 100k inhabitants between Jan 2017 and Jan 2020; in the third column, the ICU hospital beds per 100k inhabitants variation between Jan 2017 and Jan 2020. The fourth column reports the estimate of the variation in the share of municipal spending dedicated to health issues between 2019 and 2020. Lastly, the fifth and sixth columns show estimates for the variation of hospital beds per 100k inhabitants between Feb 2020 and Dec 2020 - total beds and ICU beds, respectively. Panel B describes results for the main non-pharmaceutical interventions adopted by mayors until July 2020. The first column outcome is the total number of NPIs adopted. The remaining columns are dummies variables indicating whether a specific NPI was adopted. In any case, we are estimating a second-degree polynomial using a uniform kernel. Optimal bandwidths following [Calonico et al. \(2014\)](#) were chosen to minimize the mean squared error of the local polynomial RD point estimator. Following that same work, we report robust-bias corrected p-values and 95% CIs. All estimates account for state fixed-effects following Equation 1. Coefficients significantly different from zero at 99% (\*\*\*) , 95% (\*\*) and 90% (\*) confidence level.



**Table A10:** Mayor's characteristics balance around the threshold

|                                         | Mayor's years<br>of schooling | Mayor's<br>Age    | Healthcare<br>professional | Mayor's party<br>ideology |
|-----------------------------------------|-------------------------------|-------------------|----------------------------|---------------------------|
| <i>Panel A: Linear specification</i>    |                               |                   |                            |                           |
| RD Estimator                            | 0.9535                        | -0.6532           | -0.0207                    | 0.1011                    |
| Robust p-value                          | 0.044**                       | 0.7               | 0.68                       | 0.099*                    |
| Robust conf. int.                       | [0.0261, 1.881]               | [-3.9316, 2.6253] | [-0.118, 0.0767]           | [-0.0189, 0.2211]         |
| CCT-Optimal BW                          | 13.6258                       | 13.0304           | 12.3187                    | 10.7246                   |
| Eff. Number Obs.                        | 703                           | 681               | 636                        | 585                       |
| <i>Panel B: Quadratic specification</i> |                               |                   |                            |                           |
| RD Estimator                            | 0.2496                        | -1.0919           | 0.0012                     | 0.1183                    |
| Robust p-value                          | 0.7                           | 0.627             | 0.985                      | 0.067*                    |
| Robust conf. int.                       | [-1.0024, 1.5016]             | [-5.4941, 3.3102] | [-0.1259, 0.1283]          | [-0.008, 0.2446]          |
| CCT-Optimal BW                          | 16.2465                       | 15.3507           | 16.4033                    | 20.5549                   |
| Eff. Number Obs.                        | 811                           | 780               | 814                        | 905                       |

*Notes:* This table reports our RD estimates of the association between female mayors and four outcomes. In the first column, the outcome variable is the mayor's years of schooling. In the second column, the outcome variable is the mayor's age. The third column show results for a dummy indicating if the mayor is a healthcare professional. In the fourth and last column, the outcome variable is a mayor's party ideology index that varies from -1 (far-left) to 1 (far-right). Panel A shows the results for a first-degree polynomial estimation. Panel B shows the results for a second-degree polynomial estimation. Every specification uses a uniform kernel. Optimal bandwidths following [Calonico et al. \(2014\)](#) were chosen to minimize the mean squared error of the local polynomial RD point estimator. Following that same work, we report robust-bias corrected p-values and 95% CIs. All estimates account for state fixed-effects following Equation 1. Coefficients significantly different from zero at 99% (\*\*\*), 95% (\*\*) and 90% (\*) confidence level.

**Table A11:** Impact of female leadership on COVID-19 deaths and cases, RDD estimates - Robustness controlling for mayor's characteristics

|                                         | COVID-19 deaths<br>per 100k pop. | COVID-19 hospitalizations<br>per 100k pop. | SARI deaths<br>per 100k pop. | SARI hospitalizations<br>per 100k pop. |
|-----------------------------------------|----------------------------------|--------------------------------------------|------------------------------|----------------------------------------|
| <i>Panel A: Linear specification</i>    |                                  |                                            |                              |                                        |
| RD Estimator                            | -26.2774                         | -46.1559                                   | -20.6819                     | -50.4271                               |
| Robust p-value                          | 0.0001***                        | 0.015**                                    | 0.025**                      | 0.063*                                 |
| Robust conf. int.                       | [-41.8046, -10.7502]             | [-83.4677, -8.8441]                        | [-38.7906, -2.5733]          | [-103.5197, 2.6655]                    |
| CCT-Optimal BW                          | 9.0783                           | 8.5562                                     | 9.4467                       | 8.7588                                 |
| Eff. Number Obs.                        | 510                              | 486                                        | 525                          | 492                                    |
| <i>Panel B: Quadratic specification</i> |                                  |                                            |                              |                                        |
| RD Estimator                            | -23.4372                         | -51.5783                                   | -21.6216                     | -61.5871                               |
| Robust p-value                          | 0.009***                         | 0.02**                                     | 0.03**                       | 0.046**                                |
| Robust conf. int.                       | [-41.1054, -5.7691]              | [-95.1134, -8.0433]                        | [-41.3816, -1.8615]          | [-121.9694, -1.2049]                   |
| CCT-Optimal BW                          | 15.5193                          | 15.2278                                    | 15.97                        | 16.4266                                |
| Eff. Number Obs.                        | 779                              | 769                                        | 799                          | 808                                    |

*Notes:* This table reports our RD estimates of the effect of female mayors on the number of deaths and hospitalizations by COVID-19 and SARI per hundred thousand inhabitants in 2020 in Brazilian municipalities. Note that COVID-19 numbers are a subset of SARI numbers. Estimation proceeded over the 1222 municipalities in our mixed-gender elections sample. Panel A shows the results for a first-degree polynomial estimation. Panel B shows the results for a second-degree polynomial estimation. Optimal bandwidths following [Calonico et al. \(2014\)](#) were chosen to minimize the mean squared error of the local polynomial RD point estimator. Following that same work, we report robust-bias corrected p-values and 95% CIs. All estimates controls for mayor's party ideology and mayor's years of schooling. Following Equation 1, all estimates also account for state fixed-effects. Coefficients significantly different from zero at 99% (\*\*\*) , 95% (\*\*) and 90% (\*) confidence level.

**Table A12:** Impact of female leadership on health investment and non-pharmaceutical interventions, RDD estimates - Robustness controlling for mayor's characteristics

| <i>Panel A: Investment in Health</i>             |                                                   |                                            |                                          |                                                   |                                            |                                          |
|--------------------------------------------------|---------------------------------------------------|--------------------------------------------|------------------------------------------|---------------------------------------------------|--------------------------------------------|------------------------------------------|
|                                                  | Pre-Outbreak                                      |                                            |                                          | Post-Outbreak                                     |                                            |                                          |
|                                                  | $\Delta$ Health spending<br>(share of total spd.) | $\Delta$ Total hosp. beds<br>per 100k pop. | $\Delta$ ICU hosp. beds<br>per 100k pop. | $\Delta$ Health spending<br>(share of total spd.) | $\Delta$ Total hosp. beds<br>per 100k pop. | $\Delta$ ICU hosp. beds<br>per 100k pop. |
| RD Estimator                                     | -0.004                                            | -13.512                                    | -0.314                                   | 0.005                                             | -2.736                                     | -0.216                                   |
| Robust p-value                                   | 0.704                                             | 0.165                                      | 0.29                                     | 0.651                                             | 0.567                                      | 0.719                                    |
| Robust conf. int.                                | [-0.0266, 0.018]                                  | [-32.5942, 5.5701]                         | [-0.8956, 0.2674]                        | [-0.0182, 0.0292]                                 | [-12.101, 6.6286]                          | [-1.3929, 0.9611]                        |
| CCT-Optimal BW                                   | 16.884                                            | 17.545                                     | 8.251                                    | 25.797                                            | 12.866                                     | 11.671                                   |
| Eff. Number Obs.                                 | 767                                               | 839                                        | 486                                      | 795                                               | 668                                        | 614                                      |
| <i>Panel B: Non-Pharmaceutical Interventions</i> |                                                   |                                            |                                          |                                                   |                                            |                                          |
| $\infty$                                         | Number of<br>NPIs                                 | Face covering<br>required                  | Gatherings<br>prohibition                | <i>Cordon<br/>sanitaire</i>                       | Closure of<br>non-essentials               | Public transport<br>restriction          |
| RD Estimator                                     | 0.377                                             | 0.089                                      | 0.062                                    | 0.147                                             | -0.085                                     | 0.121                                    |
| Robust p-value                                   | 0.053*                                            | 0.027**                                    | 0.05**                                   | 0.066*                                            | 0.33                                       | 0.253                                    |
| Robust conf. int.                                | [-0.0045, 0.7577]                                 | [0.0101, 0.1675]                           | [-1e-04, 0.1232]                         | [-0.0098, 0.3044]                                 | [-0.2554, 0.0859]                          | [-0.0862, 0.3281]                        |
| CCT-Optimal BW                                   | 10.256                                            | 14.954                                     | 8.604                                    | 12.86                                             | 9.873                                      | 11.025                                   |
| Eff. Number Obs.                                 | 353                                               | 478                                        | 315                                      | 417                                               | 347                                        | 366                                      |

*Notes:* This table reports our RD estimates of the association between female mayors and several outcomes. The level of observation is the municipality. Panel A reports results on health investment-related outcomes. This panel is divided into pre and post pandemic outbreak outcomes. In the first column of Panel A, the outcome is the variation in the share of municipal spending dedicated to health issues between 2016 and 2019. In the second column, the outcome is the variation of total hospital beds per 100k inhabitants between Jan 2017 and Jan 2020; in the third column, the ICU hospital beds per 100k inhabitants variation between Jan 2017 and Jan 2020. The fourth column reports the estimate of the variation in the share of municipal spending dedicated to health issues between 2019 and 2020. Lastly, the fifth and sixth columns show estimates for the variation of hospital beds per 100k inhabitants between Feb 2020 and Dec 2020 - total beds and ICU beds, respectively. Panel B describes results for the main non-pharmaceutical interventions adopted by mayors until July 2020. The first column outcome is the total number of NPIs adopted. The remaining columns are dummies variables indicating whether a specific NPI was adopted. In any case, we are estimating a first-degree polynomial using a uniform kernel. Optimal bandwidths following [Calonico et al. \(2014\)](#) were chosen to minimize the mean squared error of the local polynomial RD point estimator. Following that same work, we report robust-bias corrected p-values and 95% CIs. All estimates controls for mayor's party ideology and mayor's years of schooling. Following Equation 1, all estimates also account for state fixed-effects. Coefficients significantly different from zero at 99% (\*\*\*) , 95% (\*\*) and 90% (\*) confidence level.

**Table A13:** Impact of female leadership according to President Bolsonaro support - Robustness using quadratic specification

|                              | COVID-19 deaths<br>per 100k pop. | COVID-19 hospitalizations<br>per 100k pop. | SARI deaths<br>per 100k pop. | SARI hospitalizations<br>per 100k pop. | Number of<br>NPIs |
|------------------------------|----------------------------------|--------------------------------------------|------------------------------|----------------------------------------|-------------------|
| <i>Panel A: Above median</i> |                                  |                                            |                              |                                        |                   |
| RD Estimator                 | -43.94                           | -94.2421                                   | -34.3556                     | -105.2422                              | 0.4094            |
| Robust p-value               | 0.003***                         | 0.012**                                    | 0.027**                      | 0.047**                                | 0.156             |
| Robust conf. int.            | [-72.5556, -15.3243]             | [-167.321, -21.1632]                       | [-64.7128, -3.9984]          | [-209.0672, -1.4173]                   | [-0.1567, 0.9755] |
| CCT-Optimal BW               | 15.4581                          | 14.2121                                    | 16.6763                      | 14.2337                                | 18.2582           |
| Eff. Number Obs.             | 351                              | 326                                        | 370                          | 327                                    | 305               |
| <i>Panel B: Below median</i> |                                  |                                            |                              |                                        |                   |
| RD Estimator                 | -2.5373                          | -11.3022                                   | -2.9495                      | -13.2701                               | 0.5405            |
| Robust p-value               | 0.8033                           | 0.671                                      | 0.8085                       | 0.7242                                 | 0.1016            |
| Robust conf. int.            | [-22.5075, 17.4329]              | [-63.4439, 40.8395]                        | [-26.7999, 20.901]           | [-86.9758, 60.4356]                    | [-0.1066, 1.1877] |
| CCT-Optimal BW               | 15.2442                          | 13.8614                                    | 14.3811                      | 15.4596                                | 11.4536           |
| Eff. Number Obs.             | 421                              | 388                                        | 399                          | 427                                    | 163               |

*Notes:* This table reports our RD estimates of the effect of female mayors on few COVID-19 and SARI related outcomes accordingly to Jair Bolsonaro's support across municipalities in the Brazilian 2018 presidential election's second round. The four first columns show our primary outcomes: the number of hospitalizations and deaths by COVID-19 and SARI per hundred thousand inhabitants in 2020 - note that COVID-19 numbers are a subset of SARI numbers. The last column shows the estimate for the number of adopted non-pharmaceutical interventions in the municipality until July 2020. Panel A shows results for municipalities with Bolsonaro's vote-share above (or equal) to Bolsonaro's median municipal vote share. Panel B shows results for municipalities with Bolsonaro's vote-share below Bolsonaro's median municipal vote-share. In both cases, we estimate a second-degree polynomial using a uniform kernel. Optimal bandwidths following [Calonico et al. \(2014\)](#) were chosen to minimize the mean squared error of the local polynomial RD point estimator. Following that same work, we report robust-bias corrected p-values and 95% CIs. All estimates account for state fixed-effects following Equation 1. Coefficients significantly different from zero at 99% (\*\*\*) , 95% (\*\*) and 90% (\*) confidence level.

**Table A14:** Impact of female leadership on COVID-19 deaths and cases:  
local DID estimates using quarterly data also shows negative effects

|                                      | SARI deaths<br>per 100k pop |                      | SARI hospitalizations<br>per 100k pop |                       |
|--------------------------------------|-----------------------------|----------------------|---------------------------------------|-----------------------|
|                                      | (1)                         | (2)                  | (3)                                   | (4)                   |
| Female Mayor $\times$ Post Outbreak  | -7.096<br>[3.038]**         | -9.018<br>[3.417]*** | -19.470<br>[9.325]**                  | -24.444<br>[10.737]** |
| Bandwidth                            | 9.419                       | 15.911               | 8.566                                 | 16.752                |
| Observations                         | 8048                        | 12288                | 7456                                  | 12576                 |
| Num. of municipalities               | 503                         | 768                  | 466                                   | 786                   |
| R-squared                            | 0.551                       | 0.566                | 0.657                                 | 0.645                 |
| Municipality FEs                     | Yes                         | Yes                  | Yes                                   | Yes                   |
| State-Year-Quarter FEs               | Yes                         | Yes                  | Yes                                   | Yes                   |
| Year-Quarter FEs $\times$ Polynomial | Yes                         | Yes                  | Yes                                   | Yes                   |
| Polynomial                           | Linear                      | Quadratic            | Linear                                | Quadratic             |

*Notes:* This table displays estimates of the effect of electing a female mayor in the 2016 election across from a local differences in differences (DID) specification using quarterly data. The local DID regression model has the form  $y_{mst} = \beta \cdot FemaleMayor_{ms} \cdot Post\_Outbreak_t + f_t(FemaleVoteMargin_{ms}) + \theta_{ms} + \lambda_{st} + \epsilon_{mst}$  where  $\theta_{ms}$  captures municipality fixed-effects and  $\lambda_{st}$  captures state-year-quarter fixed effects.  $FemaleMayor_{ms} = \mathbb{1}(FemaleVoteMargin_{ms} > 0)$  is an indicator variable equal to one when the municipality  $m$  in the state  $s$  elected a woman as a mayor in 2016.  $Post\_Outbreak_t = \mathbb{1}(t > 2020.1)$  is an indicator variable that equals one after the first quarter of 2020, the last quarter after the COVID-19 outbreak. To mirror our baseline RD specification in a dynamic setting, we control for  $f_t(FemaleVoteMargin_{ms}) = f_t(FemaleVoteMargin_{ms}) \cdot \mathbb{1}(FemaleVoteMargin_{ms} > 0) + f_t(FemaleVoteMargin_{ms}) \cdot \mathbb{1}(FemaleVoteMargin_{ms} < 0)$ , a year-quarter specific polynomial in the vote-share of female candidates with parameters that vary flexibly for municipalities that elected a man and a woman as a mayor in 2016. Each local DID specification uses the sample of the RD baseline estimates with the same outcome and RD polynomial that is reported in table 1. We display clustered standard errors at the municipality level between squared brackets. Coefficients significantly different from zero at 99% (\*\*\*), 95% (\*\*), and 90% (\*) confidence levels.
